# Supplementary material
Source: PubMed Central journal article supplement (PMC1636614)
Supplement: 7601417s2.pdf [file 7601417s2.pdf]

Figure S2. Failure of PKC and DAG metabolites in OAG- or Ang II-induced NFAT activation.

(**A, B**) Effects of bisindolylmaleimide (BIM) on OAG-induced increases in NFAT-dependent luciferase activity (**A**) and nuclear localization of GFP-NFAT4 (**B**). Cells were treated with BIM (5  $\mu$ M) for 30 min before the addition of OAG (25  $\mu$ M). (C) Effects of PLA<sub>2</sub> inhibitors on Ang II-induced NFAT translocation. Cells were treated with PACOCF<sub>3</sub> (1  $\mu$ M) or cPLA<sub>2</sub> inhibitor (1  $\mu$ M) for 30 min before the addition of Ang II (100 nM). Cells were treated with arachidonic acid (AA, 10  $\mu$ M) for 30 min. NS, no significance from Control.

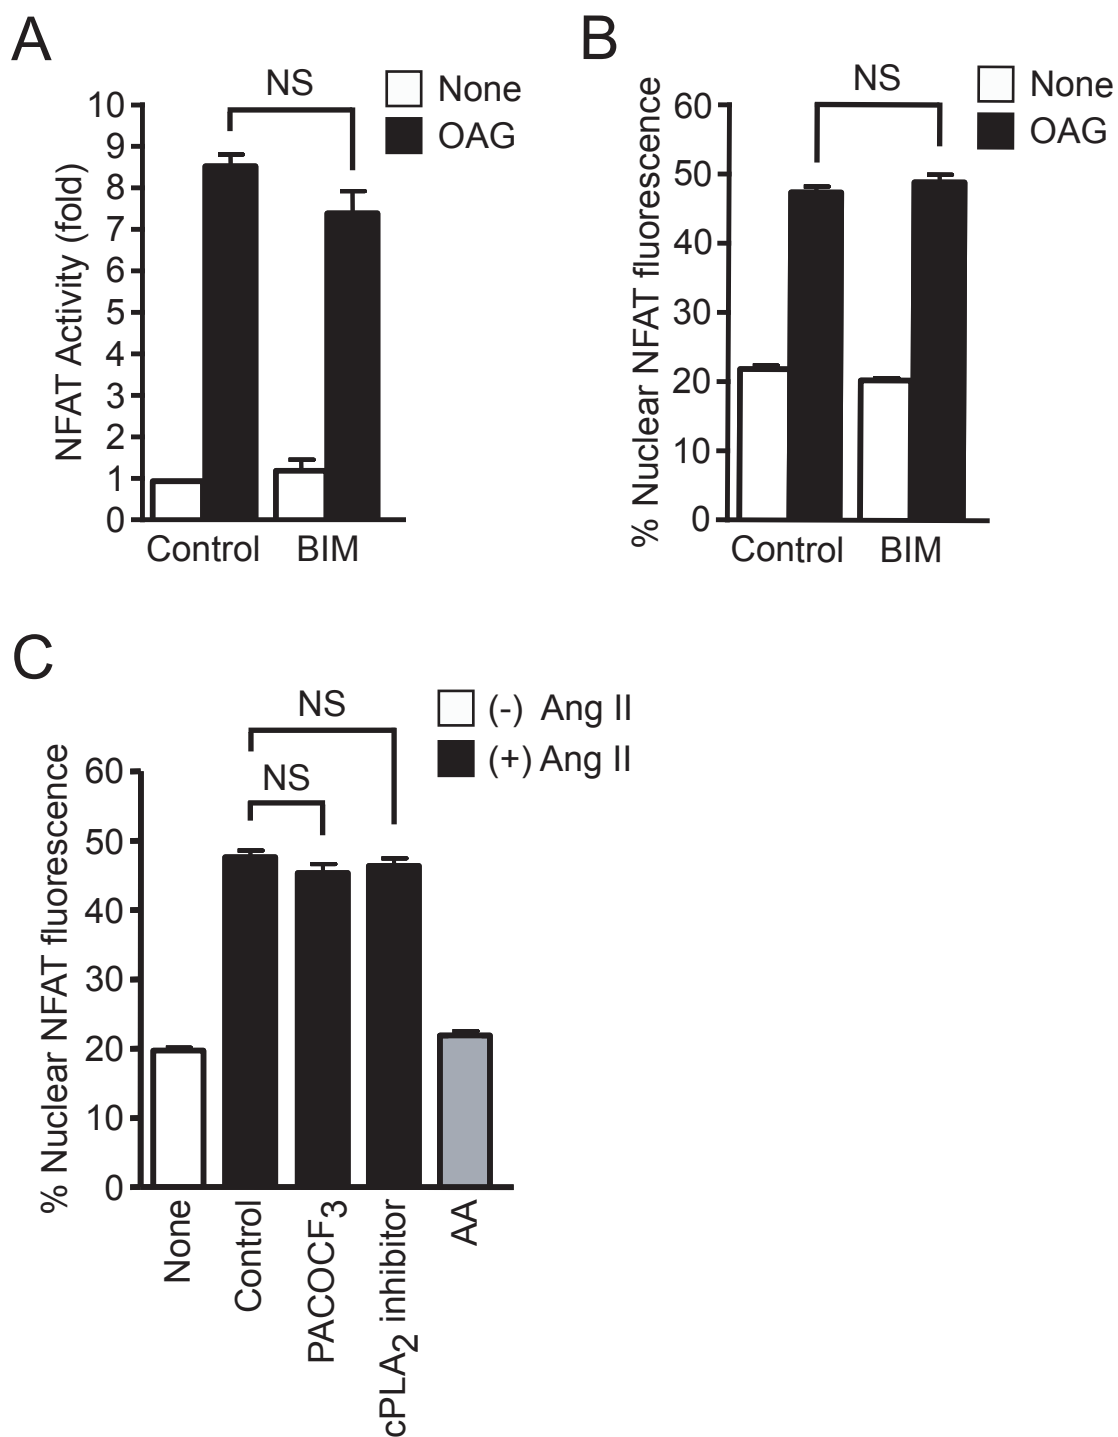

Supplemental Figure S2 Onohara *et al.*
