# Supplementary material
Source: PubMed Central journal article supplement (PMC1636614)
Supplement: 7601417s3.pdf [file 7601417s3.pdf]

Figure S3. Involvement of TRPC3 and TRPC6 in Ang II-induced  $\text{Ca}^{2+}$  entry.

(A) Peak changes of increases in  $[\text{Ca}^{2+}]_i$  induced by OAG (25  $\mu\text{M}$ ) in control (LacZ)-, TRPC3-, TRPC6-, and TRPC7-overexpressing cells. (B) Effects of siRNAs of TRPC3 and TRPC6 on the expression of the respective TRPC proteins. (C-F) Effects of siRNAs of TRPC3 (C, D) and TRPC6 (E, F) on Ang II-induced increases in  $[\text{Ca}^{2+}]_i$ . (C, E) Average time courses of  $\text{Ca}^{2+}$  responses induced by Ang II.  $\text{Ca}^{2+}$  release was first evoked in  $\text{Ca}^{2+}$ -free solution, and  $\text{Ca}^{2+}$  entry-induced  $[\text{Ca}^{2+}]_i$  increases were induced by re-addition of 2 mM  $\text{Ca}^{2+}$ . (D, F) Peak  $[\text{Ca}^{2+}]_i$  increases in  $\text{Ca}^{2+}$ -free solution and after  $\text{Ca}^{2+}$  re-addition. \*\*,  $P < 0.01$  vs control siRNA-treated cells (Control). NS, no significance from Control.

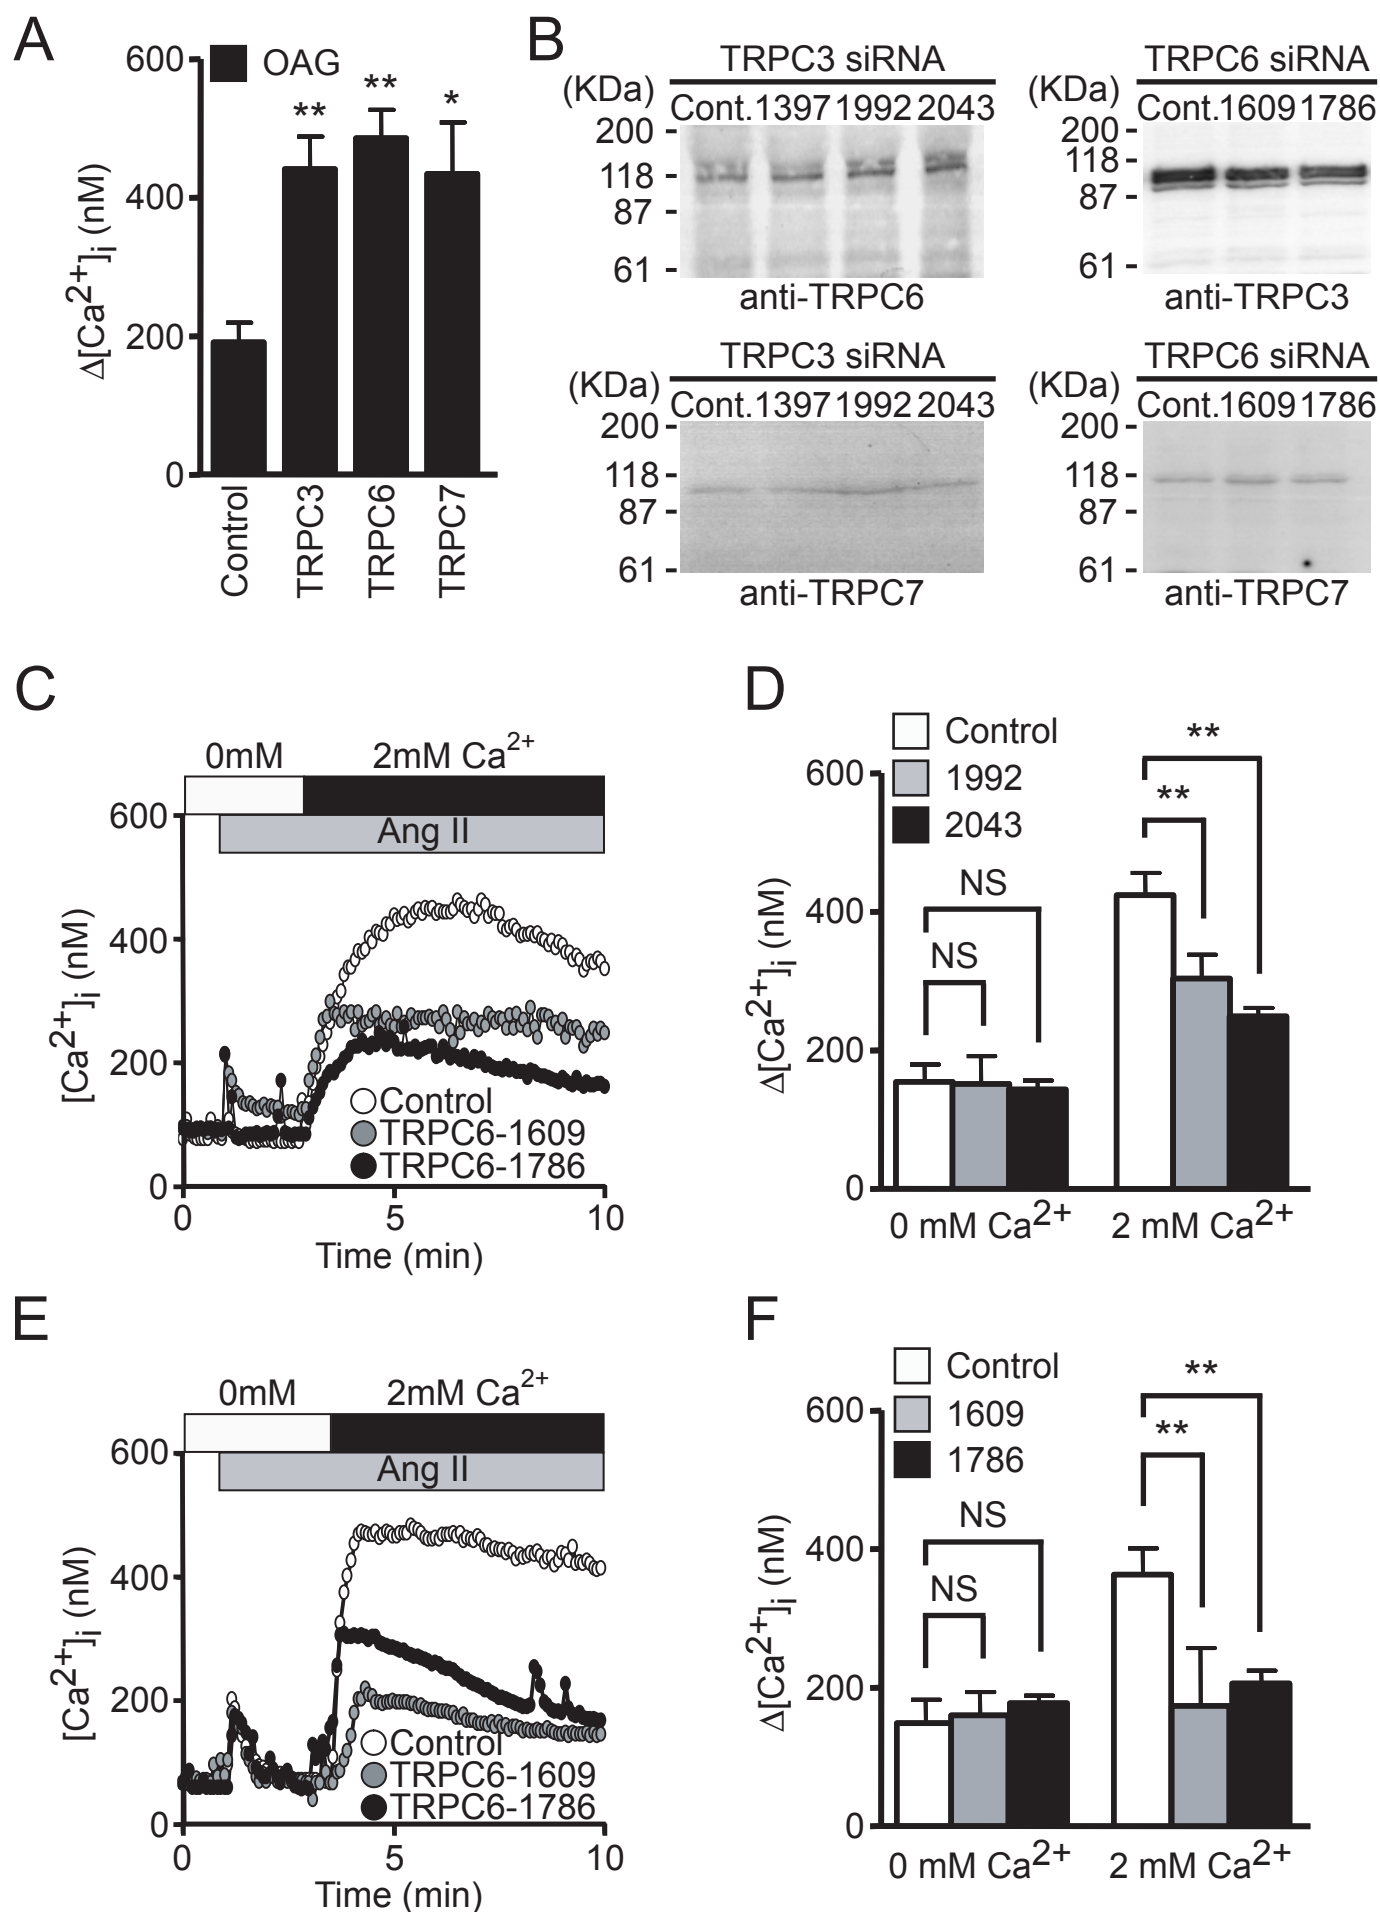

Supplementary Figure S3 Onohara *et al.*
