# Supplementary material
Source: PubMed Central journal article supplement (PMC1636614)

Figure S4. Requirement of TRPC6 in Ang II-induced hypertrophic responses.

(**A-C**) Effects of dominant negative TRPC6 (TRPC6- $\Delta$ (N) and TRPC6-3A) on Ang II-induced NFAT activation (**A**), actin reorganization (**B**), and protein synthesis (**C**).

Scale bar = 20  $\mu$ m. \*  $P < 0.05$ , \*\* $P < 0.01$  vs Ang II stimulation of LacZ-expressing cells.

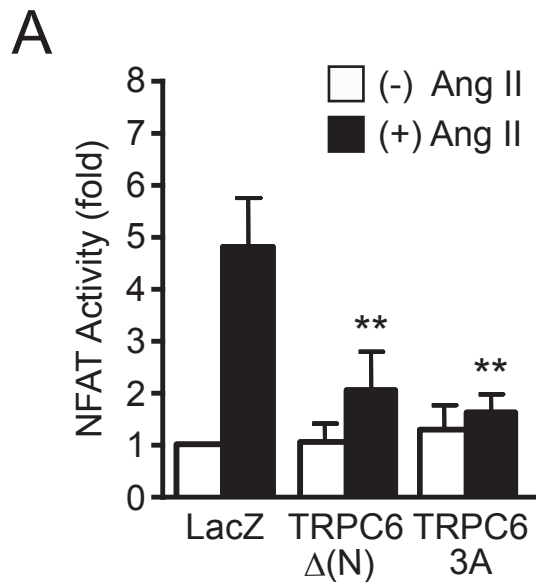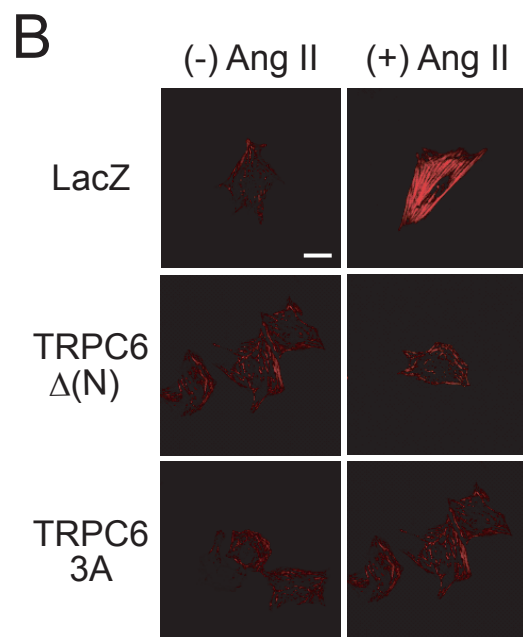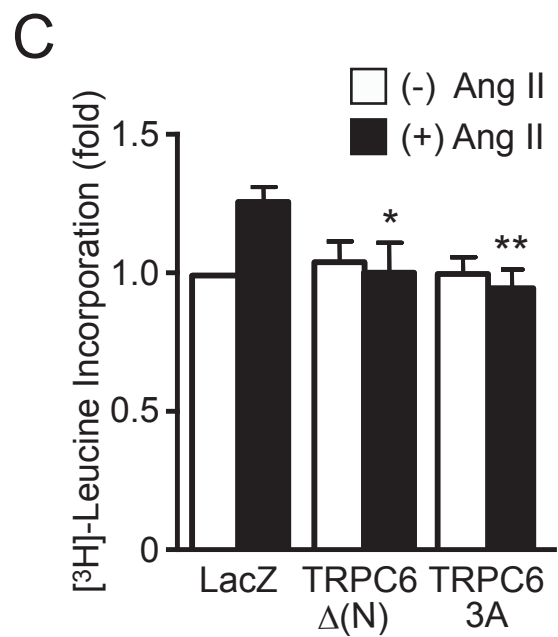

Supplement: 7601417s4.pdf [file 7601417s4.pdf]
