# Supplementary material
Source: PubMed Central journal article supplement (PMC1636614)

Figure S5. Failure of IP<sub>3</sub>-mediated signaling in Ang II-induced NFAT activation.

(A) Fluorescence image of caged-IP<sub>3</sub> (10 μM)-induced localization of GFP-NFAT4 upon UV irradiation. UV (340 nm, 180 msec) was irradiated every 10 sec for 1 min. (B) Quantification of nuclear predominant fluorescence of GFP-NFAT4. NS, no significance from Control. (C, D) Typical traces (C) and peak changes (D) of caged-IP<sub>3</sub>-induced increases in [Ca<sup>2+</sup>]<sub>i</sub> (Ca<sup>2+</sup> release) upon UV irradiation in Ca<sup>2+</sup>-free Tyrode solution. \*\*\*;  $P < 0.001$  vs Control. Pluronic F127 (Dojindo) was also included at 0.1% during fura-2 loading and washed. Caged-IP<sub>3</sub> was then applied to the cells.

**A**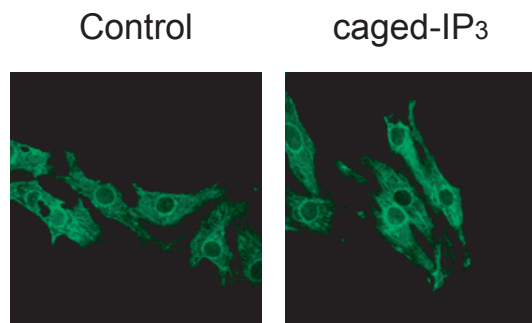**B**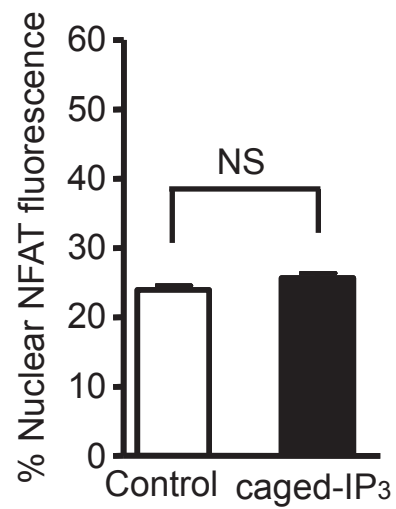**C**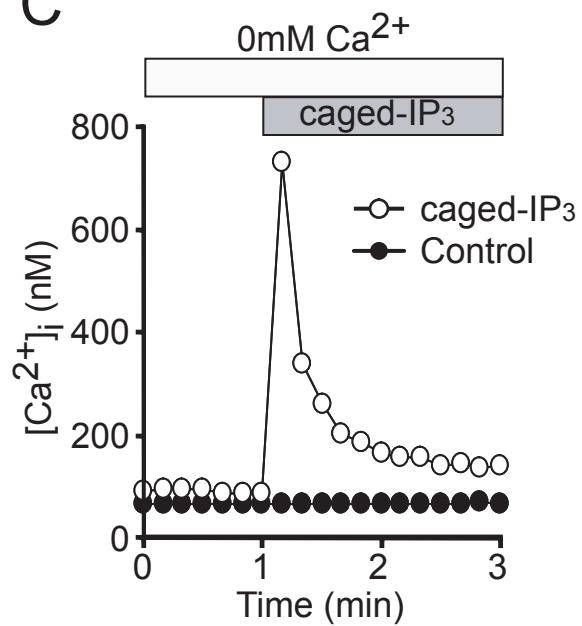**D**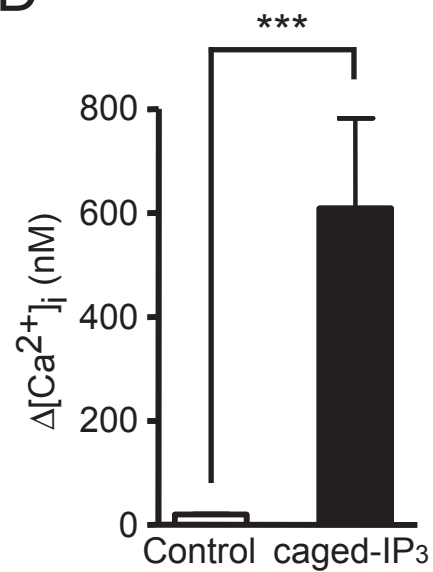

Supplement: 7601417s5.pdf [file 7601417s5.pdf]
