# Supplementary material
Source: PubMed Central journal article supplement (PMC1636614)
Supplement: 7601417s6.pdf [file 7601417s6.pdf]

### Supplementary Table 1

#### Sequences of Stealth siRNA oligonucleotides used

| Target gene (start location) | Orientation | primers (5'-3')            |
|------------------------------|-------------|----------------------------|
| TRPC3 (1397)                 | sense       | GGAUCGCGUACAUCUCCCUGCAA    |
|                              | antisense   | UUUGCAGGGAGAAUGUACGCGAUCC  |
| TRPC3 (1992)                 | sense       | CCUCUUCACUCAGUCUAAACUCGAGA |
|                              | antisense   | UCUCGAGUUAGACUGAGUGAAGAGG  |
| TRPC3 (2043)                 | sense       | CAUUCUCAAUUCAGCCAACACGAUUA |
|                              | antisense   | AUAUCGUGUUGGCUGAUUGAGAAUG  |
| Control for TRPC3            | sense       | GGAGCGCAUUUACUCUCCCGUCAAA  |
|                              | antisense   | UUUGACGGGAGAGUAAAUGCGCUCC  |
| TRPC6 (1609)                 | sense       | GCAGCAUCAUUCAUUGCAAGAUUUA  |
|                              | antisense   | UAAAUCUUGCAAUGAAUGAUGCUGC  |
| TRPC6 (1786)                 | sense       | GGUCUUUAUGCAAUCGCGGUGGUUU  |
|                              | antisense   | AAACCACCGCGAUUGCAUAAAGACC  |
| Control for TRPC6            | sense       | GGUUAUUAACGCGCUGUGGGUCUUU  |
|                              | antisense   | AAAGACCCACAGCGCGUUAUAACC   |
